# Supplementary material
Source: PubMed Central journal article supplement (PMC2937935)
Supplement: supp_C110.165076_jbc.C110.165076-1.pdf [file supp_C110.165076_jbc.C110.165076-1.pdf]

## SUPPLEMENTAL FIGURES FOR

### Only One ATP-Binding DnaX Subunit is Required for Initiation Complex Formation by the *E. coli* DNA Polymerase III Holoenzyme

Anna Wieczorek, Christopher D. Downey, H. Garry Dallmann and Charles S. McHenry

From the Department of Chemistry and Biochemistry, University of Colorado, Boulder, CO 80309

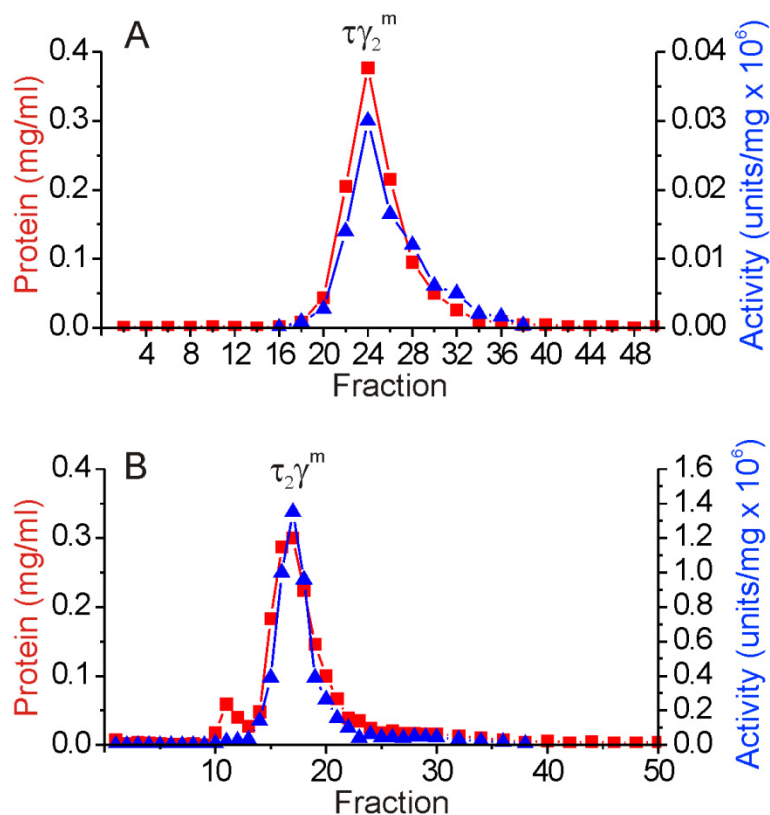

**FIGURE S1. Rechromatography of DnaX complexes.** Complexes containing a mixture of K51E and wild-type DnaX protomers (obtained as shown in Figure 1 of the main paper) were rechromatographed on the Mono-S column to ensure purity. Representative purifications are shown. *A*, Rechromatography of  $\tau\gamma_2^m$  complex was performed using a shallow 20-column volume gradient of 0.08–0.17 mM NaCl with other components and procedures as described for Mono S chromatography under *Experimental Procedures* in the main paper. *B*, Rechromatography of  $\tau_2\gamma^m$  complex was done in the 20-column volume gradient of 0.14–0.19 mM NaCl.

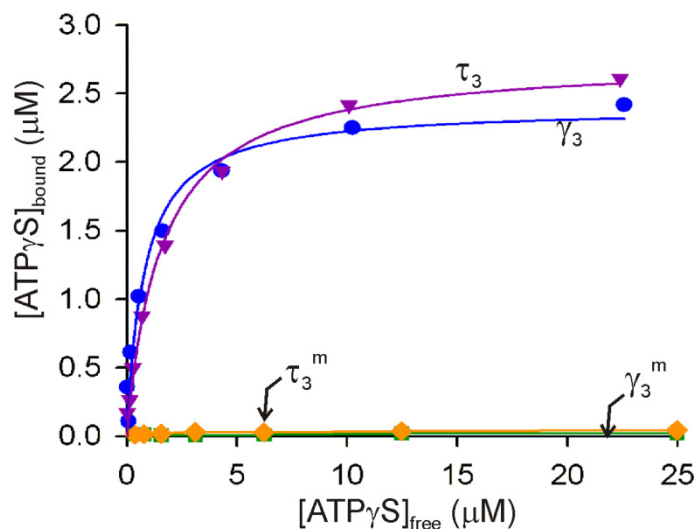

**FIGURE S2. A K51E change in the DnaX Walker A motif eliminates ATP binding.**

For each data point, 1.0  $\mu\text{M}$  of the indicated DnaX complex was incubated at room temperature with 0–25  $\mu\text{M}$  [ $^{35}\text{S}$ ] ATP $\gamma\text{S}$  (specific activity  $\sim 1000$  cpm/pmol) in binding buffer (50 mM HEPES (pH 7.5), 100 mM  $\text{K}^+$  glutamate, 10 mM  $\text{Mg}^{2+}$  acetate, 5% glycerol, 5 mM DTT) in a volume of 12.5  $\mu\text{L}$ . A 25 mm nitrocellulose filter (Millipore) pre-soaked in wash buffer (50 mM HEPES (pH 7.5), 100 mM  $\text{K}^+$  glutamate, 10 mM  $\text{Mg}^{2+}$  acetate) was placed in a 10 mL glass vacuum manifold (Millipore); vacuum was applied, and the filter was washed with 1.5 mL ice-cold wash buffer. With the vacuum off, 10.0  $\mu\text{L}$  of sample was spotted onto the filter. The vacuum was reapplied and the samples washed with 1.0 mL cold wash buffer dripped on at a rate of  $\sim 0.2$  mL/s. The filters were dried and counted by liquid scintillation. The counted values were corrected for filtration efficiency, which was determined as the fraction of the total  $^{35}\text{S}$  counts retained on the filter with limiting ATP $\gamma\text{S}$  and saturating DnaX complex. The efficiency was 0.69 for  $\gamma_3$  complex and 0.77 for  $\tau_3$  complex. The free ATP $\gamma\text{S}$  concentration was determined as total ATP $\gamma\text{S}$  minus bound ATP $\gamma\text{S}$ . The  $\gamma_3$  and  $\tau_3$  data were fit to a binding isotherm to determine the dissociation constant ( $K_d$ ) and apparent total ATP receptor concentration ( $R_t$ ):

$$[\text{ATP}\gamma\text{S}]_{\text{bound}} = \frac{R_t [\text{ATP}\gamma\text{S}]_{\text{free}}}{K_d + [\text{ATP}\gamma\text{S}]_{\text{free}}}$$

The curve fits yielded  $K_d = 1 \mu\text{M}$  and  $R_t = 2.4 \mu\text{M}$  for the  $\gamma_3$  complex and  $K_d = 2 \mu\text{M}$  and  $R_t = 2.7 \mu\text{M}$  for the  $\tau_3$  complex.

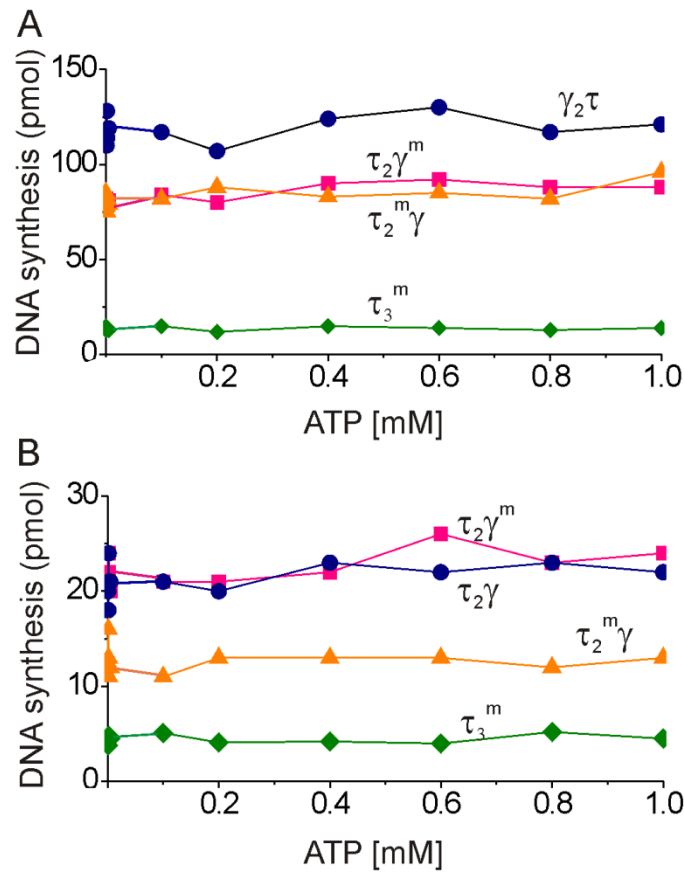

**FIGURE S3. High concentrations of ATP do not overcome defects observed in DnaX complexes containing K51E  $\gamma$  or  $\tau$  subunits.** ATP was titrated under two sets of conditions using the reconstitution assay as described under *Experimental Procedures* in the main paper. Representative protein complexes containing two or three  $\tau$  subunits but at least one wild-type subunit were used. *A*, Assays were performed at a DnaX complex concentration corresponding to 50% of the amount required for maximal activity in the presence of saturating  $\beta_2$  ( $7 \times K_d$ ). *B*, Assays were performed with the DnaX complex concentration set at 0.8 nM and  $\beta_2$  set at one-half of the  $K_d$  of each complex (Table 1). dATP will substitute for ATP in supporting initiation complex formation by the Pol III HE. The 48  $\mu$ M dATP present in the elongation mix is adequate to support full DnaX activity in the absence of ATP in all cases.
